# Supplementary material for: Orthotopic Liver Transplantation in a Patient with Acutely Decompensated Liver Disease and Personal History of Malignant Hyperthermia
Source: Hindawi journal article supplement (doi:10.1155/2022/4996977), 2022-09-17
Supplement: f1 [file 4996977.f1.zip]

## CARE Checklist of information to include when writing a case report

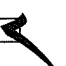

| Topic                       | Checklist item description                                                                                          | Reported on Line                                                    |
|-----------------------------|---------------------------------------------------------------------------------------------------------------------|---------------------------------------------------------------------|
| Title                       | 1 The diagnosis or intervention of primary focus followed by the words "case report" . . . . .                      | Page 1 lines 1-2                                                    |
| Key Words                   | 2 2 to 5 key words that identify diagnoses or interventions in this case report, including "case report" . . .      | Page 1 line 34                                                      |
| Abstract<br>(no references) | 3a Introduction: What is unique about this case and what does it add to the scientific literature? . . . . .        | Page 1 lines 14-21                                                  |
|                             | 3b Main symptoms and/or important clinical findings . . . . .                                                       | Page 1 lines 22-23                                                  |
|                             | 3c The main diagnoses, therapeutic interventions, and outcomes . . . . .                                            | Page 1 lines 23-26; 30-31                                           |
|                             | 3d Conclusion—What is the main "take-away" lesson(s) from this case? . . . . .                                      | Page 1 lines 27-32                                                  |
| Introduction                | 4 One or two paragraphs summarizing why this case is unique ( <b>may include references</b> ) . . . . .             | Page 1, 33-47; Page 2 lines 1-5                                     |
| Patient Information         | 5a De-identified patient specific information . . . . .                                                             | Page 2 lines 8-19                                                   |
|                             | 5b Primary concerns and symptoms of the patient . . . . .                                                           | Page 2 lines 11-19; 23-31                                           |
|                             | 5c Medical, family, and psycho-social history including relevant genetic information . . . . .                      | Page 2 9-10; 21-26                                                  |
|                             | 5d Relevant past interventions with outcomes . . . . .                                                              | Page 2 lines 21-22                                                  |
| Clinical Findings           | 6 Describe significant physical examination (PE) and important clinical findings. . . . .                           | Page 2 lines 28-31; 36                                              |
| Timeline                    | 7 Historical and current information from this episode of care organized as a timeline. . . . .                     | Page 2 lines 8-47, page 3 1-7                                       |
| Diagnostic Assessment       | 8a Diagnostic testing (such as PE, laboratory testing, imaging, surveys). . . . .                                   | Page 2 lines 17-19                                                  |
|                             | 8b Diagnostic challenges (such as access to testing, financial, or cultural) . . . . .                              | N/A                                                                 |
|                             | 8c Diagnosis (including other diagnoses considered) . . . . .                                                       | Page 2 line 5 11-14                                                 |
|                             | 8d Prognosis (such as staging in oncology) where applicable . . . . .                                               | Page 2 lines 13-14                                                  |
| Therapeutic Intervention    | 9a Types of therapeutic intervention (such as pharmacologic, surgical, preventive, self-care) . . . . .             | Page 2 lines 37-47, Page 3 1-7                                      |
|                             | 9b Administration of therapeutic intervention (such as dosage, strength, duration) . . . . .                        | Page 2 lines 37-47, Page 3, 1-7                                     |
|                             | 9c Changes in therapeutic intervention (with rationale) . . . . .                                                   | N/A                                                                 |
| Follow-up and Outcomes      | 10a Clinician and patient-assessed outcomes (if available) . . . . .                                                | Page 3 lines 4-7                                                    |
|                             | 10b Important follow-up diagnostic and other test results . . . . .                                                 | N/A                                                                 |
|                             | 10c Intervention adherence and tolerability (How was this assessed?) . . . . .                                      | Page 2 lines 43; Page 3 line 7                                      |
|                             | 10d Adverse and unanticipated events . . . . .                                                                      | N/A                                                                 |
| Discussion                  | 11a A scientific discussion of the strengths AND limitations associated with this case report. . . . .              | Page 3 lines 25-46; Page 4 1-19                                     |
|                             | 11b Discussion of the relevant medical literature <b>with references</b> . . . . .                                  | Page 3 lines 10-46; Page 4 1-19                                     |
|                             | 11c The scientific rationale for any conclusions (including assessment of possible causes). . . . .                 | Page 3 lines 33-46, Page 4 1-12                                     |
|                             | 11d The primary "take-away" lessons of this case report (without references) in a one paragraph conclusion. . . . . | Page 4 lines 17-19                                                  |
| Patient Perspective         | 12 The patient should share their perspective in one to two paragraphs on the treatment(s) they received. . . . .   | N/A - Amputated                                                     |
| Informed Consent            | 13 Did the patient give informed consent? Please provide if requested. . . . .                                      | Yes <input checked="" type="checkbox"/> No <input type="checkbox"/> |
