# Supplementary material for: Orthotopic Liver Transplantation in a Patient with Acutely Decompensated Liver Disease and Personal History of Malignant Hyperthermia
Source: Case Rep Anesthesiol. 2022 Sep 17;2022:4996977. doi: 10.1155/2022/4996977 (PMC9509212; doi:10.1155/2022/4996977)
Supplement: Supplementary Materials — 1. CARE checklist for case reports. 2. Blank consent form. [file 4996977.f1.zip]

Archive with 2 entries (2 files):
- 4996977.f1/BMC_Consent+form.pdf
- 4996977.f1/Townsend_CARE_Checklist.pdf
